# Supplementary material for: State-Dependent Network Connectivity Determines Gating in a K+ Channel
Source: PubMed Central journal article supplement (PMC4087272; doi:10.1016/j.str.2014.04.018), 2014-07-08
Supplement: mmc5.pdf [file mmc5.pdf]

# State-Dependent Network Connectivity Determines Gating in a K<sup>+</sup> Channel

Murali K. Bollepalli,<sup>1,5,6</sup> Philip W. Fowler,<sup>2,5</sup> Markus Rapedius,<sup>1</sup> Lijun Shang,<sup>3,7</sup> Mark S.P. Sansom,<sup>2,4</sup> Stephen J. Tucker,<sup>3,4,\*</sup> and Thomas Baukrowitz<sup>1,\*</sup>

<sup>1</sup>Physiological Institute, Christian-Albrechts University, 24118 Kiel, Germany

<sup>2</sup>Department of Biochemistry, University of Oxford, Oxford OX1 3QU, UK

<sup>3</sup>Clarendon Laboratory, Department of Physics, University of Oxford Oxford, OX1 3PU, UK

<sup>4</sup>OXION Ion Channel Initiative, University of Oxford, Oxford OX1 3PT, UK

<sup>5</sup>Co-first author

<sup>6</sup>Present address: Department of Physiology, Development and Neuroscience, University of Cambridge, Cambridge CB2 3EG, UK

<sup>7</sup>Present address: School of Medical Sciences, Bradford University, Bradford BD7 1DP, UK

\*Correspondence: [stephen.tucker@physics.ox.ac.uk](mailto:stephen.tucker@physics.ox.ac.uk) (S.J.T.), [t.baukrowitz@physiologie.uni-kiel.de](mailto:t.baukrowitz@physiologie.uni-kiel.de) (T.B.)

<http://dx.doi.org/10.1016/j.str.2014.04.018>

This is an open access article under the CC BY license (<http://creativecommons.org/licenses/by/3.0/>).

## SUMMARY

X-ray crystallography has provided tremendous insight into the different structural states of membrane proteins and, in particular, of ion channels. However, the molecular forces that determine the thermodynamic stability of a particular state are poorly understood. Here we analyze the different X-ray structures of an inwardly rectifying potassium channel (Kir1.1) in relation to functional data we obtained for over 190 mutants in Kir1.1. This mutagenic perturbation analysis uncovered an extensive, state-dependent network of physically interacting residues that stabilizes the pre-open and open states of the channel, but fragments upon channel closure. We demonstrate that this gating network is an important structural determinant of the thermodynamic stability of these different gating states and determines the impact of individual mutations on channel function. These results have important implications for our understanding of not only K<sup>+</sup> channel gating but also the more general nature of conformational transitions that occur in other allosteric proteins.

## INTRODUCTION

Ion channels play important and diverse roles in the control of cellular electrical excitability as well as many ion transport pathways. One of their most important properties is the ability to gate (i.e., to open and close) in response to a variety of physiological stimuli. Ion channel gating requires dynamic conformational changes, and our understanding of this process has been revolutionized over the past decade by advances in X-ray crystallography. These advances have revealed not only many individual channel structures but also examples of the same channel in several different conformational states. However, one of the major challenges in ion channel structural biology is understanding how these different crystallographic states relate to the func-

tional properties of the channel (Alam and Jiang, 2009; Bavro et al., 2012; Cuello et al., 2010; Hansen et al., 2011; Prevost et al., 2012).

Inwardly rectifying (Kir) channels are an example where many different structural states have been determined, thus making them excellent candidates to probe the functional relationship between these different conformations (Bavro et al., 2012; Clarke et al., 2010; Hansen et al., 2011; Tao et al., 2009; Whorton and MacKinnon, 2011, 2013). In particular, the structures of Kir2.2, obtained both with and without a bound phosphoinositide (PIP<sub>2</sub>), suggest that pore opening is initiated by an upward movement of the cytoplasmic domain (CTD) that then engages with the slide helix and transmembrane-pore domain (TMD) to produce a “pre-open” PIP<sub>2</sub>-bound structure (Hansen et al., 2011; Tao et al., 2009). However, for the channel to become fully conductive, it is proposed that a further rotation of the transmembrane (TM) helices then occurs to open the helix bundle crossing (HBC) gate as observed in the crystal structures of PIP<sub>2</sub>-bound Kir3.2 and the putative open-state structure of the prokaryotic KirBac3.1 (Bavro et al., 2012; Whorton and MacKinnon, 2011, 2013). These different structural states therefore allow reconstruction of a possible gating pathway for the Kir channel, and we have chosen the pH-sensitive Kir1.1 (ROMK) channel to functionally probe this structural gating scheme.

Like many other Kir channels, Kir1.1 is inhibited by intracellular H<sup>+</sup> but is activated by phosphoinositides such as PIP<sub>2</sub>. Functional studies suggest that both ligands control a similar gating mechanism at the HBC (Logothetis et al., 2007; Rapedius et al., 2006, 2007a, 2007b; Tucker and Baukrowitz, 2008; Zhang et al., 2006). However, studies of the kinetics of PIP<sub>2</sub> and pH gating indicate that lowering the pH does not induce channel closure by simply promoting the unbinding of PIP<sub>2</sub>, but rather that pH gating occurs on a more rapid timescale with PIP<sub>2</sub> still bound to the channel (Rapedius et al., 2007b). The precise mechanism of pH sensing in Kir channels remains elusive but is now thought to involve a number of titratable interactions that preferentially stabilize the open state of the channel (Paynter et al., 2010), and we have previously shown that mutations that selectively destabilize the closed state (e.g., K80M) produce a decrease in pH sensitivity (Rapedius et al., 2007a). This suggests that a change in the relative energetic stability of these states can

produce a shift in the pH-gating equilibrium and change the apparent pH sensitivity of the channel. We have therefore exploited this effect to explore the functional relationship between the different conformational states within the proposed Kir channel gating pathway.

In this study, we undertook an extensive scanning mutagenesis of Kir1.1 and measured the effect of these mutations on the pH-gating equilibrium. Our hypothesis was that by mapping many mutations with similar functional effects (e.g., destabilization of the open state) onto these different conformations of Kir1.1, we might gain a clearer insight into the state-dependent interactions that stabilize one specific structural state over another. We initially assumed that Kir1.1 channel gating can be described as a reversible transition between two structurally distinct states controlled by intracellular  $H^+$  (i.e., open and closed) and that the stability of each state will be influenced by interactions unique to each structural state. Consequently, when the channel moves between the open and closed conformations, the interactions and packing between these gating-sensitive residues will change. Thus, by mutating these residues to alanine (which will predominantly reduce interactions), we predicted that this might differentially affect the relative free energy of the closed versus open state. The aim of this approach was therefore to gain insight into the structural basis of the thermodynamic stability of the different crystallographic states within the proposed gating pathway.

To achieve this, we systematically mutated a major portion of the Kir1.1 channel (189 positions in total) and identified 49 mutations that markedly affected pH gating. These mutations were found to be in those regions predicted to undergo structural change during channel gating, thereby functionally validating this gating scheme. However, the most remarkable observation was that 95% of these mutations appeared to preferentially destabilize the open state due to their disruptive influence on a large state-dependent gating network and explain why so many mutations, including many disease-causing mutations, increase the pH sensitivity of Kir1.1. Importantly, these results also provide insight into the thermodynamic stability of these different gating states within the Kir channel gating pathway and the more general nature of the conformational transitions that occur in other allosteric proteins.

## RESULTS

### Systematic Alanine Scanning Mutagenesis of Kir1.1

Assuming that a mutation does not directly affect the actual  $H^+$ -sensing residue(s), then for a simple two-state gating scheme, any change in the  $H^+$  concentration required to half-maximally reduce channel activity ( $pH_{0.5}$ ) will be related to the change in the free energy difference between the open and closed states, i.e.,  $\Delta\Delta G_{(open-closed)} \approx 2.3RTn(pH_{0.5(WT)} - pH_{0.5\ mutant})$ , where  $n$  is the Hill coefficient. However, this is most certainly an oversimplification as the pH gating mechanism is likely to involve multiple states. Furthermore, unlike voltage-gated potassium channels (Zagotta et al., 1994), there are currently no validated kinetic gating models for pH gating of Kir1.1, and so directly calculating  $\Delta\Delta G_{(open-closed)}$  values from the shift in  $pH_{0.5}$  value is probably unjustified. Nevertheless, the direction of any change in  $pH_{0.5}$  value remains meaningful and will correlate with the direction

of the free energy change. For example, a decrease in pH sensitivity will reflect an increase in  $\Delta G_{(open-closed)}$ , whereas an increase in pH sensitivity (i.e., a lower  $[H^+]$  required to close the channel) will indicate a decrease in  $\Delta G_{(open-closed)}$ .

Kir1.1 contains 391 amino acids; therefore, analyzing every single amino acid represents a major challenge. However, current models of Kir channel gating indicate that the largest structural changes occur primarily within the TMD and at the interface between the TMD and the CTD. Consequently, we restricted mutagenesis to these regions, and the residues chosen are highlighted in Figure 1A (for details, see Table S1 available online). This selection represents 187 residues that were then individually mutated to alanine [or to valine if the wild-type (WT) sequence was already alanine] and their impact on intracellular pH gating determined. An example of one mutant (F88A) that shifts the  $pH_{0.5}$  from  $pH\ 6.4 \pm 0.1$  (for WT Kir1.1) to  $pH\ 8.3 \pm 0.1$  is shown in Figure 1B. This mutation involves a residue within transmembrane helix 1 (TM1) that is clearly nontitratable, and the approximate 80-fold change in  $[H^+]$  required to close the channel must therefore reflect changes in the relative stability of the open versus closed state.

In cases where the alanine mutants within the TM helices were nonfunctional, a more conservative amino acid substitution was also examined; when this still failed to produce functional channels, a 1:1 coexpression with wild-type Kir1.1 mRNA was finally used in an attempt to rescue channel activity. This approach maximized the data available from this systematic screen and led to  $pH_{0.5}$  values being obtained from 135 positions (Table S1). Perhaps not surprisingly, of the 52 nonfunctional mutants, many were found to be clustered in or near the selectivity filter and were not examined further.

### Biased Effect of Mutations on pH Sensitivity of Kir1.1

To summarize this large data set, the 135 functional mutants were categorized according to their relative effect on the  $pH_{0.5}$  value (Figure 1C). Mutations at 86 positions were found to have relatively little or no effect on the  $pH_{0.5}$  value (i.e., they fell within  $pH_{0.5} = 6.0$ – $6.8$  compared to wild-type Kir1.1,  $pH_{0.5} = 6.4$ ) (Figure 1C), and many of these residues were located on the outer surface of the channel, in particular the outer face of TM1 (Movie S1). However, of most interest was the startling observation that out of the 49 mutations that shifted the  $pH_{0.5}$  by  $> 0.4$  pH units, 47 (i.e.,  $> 95\%$ ) were shifted into the alkaline range ( $pH_{0.5} > pH\ 6.8$ ) (Figure 1C), whereas only 2 mutations produced a reduction in pH sensitivity ( $pH_{0.5} < pH\ 6.0$ ), both of which have been identified previously (K80A and I63A). This extreme functional bias is clearly visible in the histogram in Figure 1C.

The pH inhibition of wild-type Kir1.1 has a Hill coefficient of  $2.5 \pm 0.2$ , but although the majority of the 49 mutations that changed the  $pH_{0.5}$  had relatively little effect on the Hill coefficient ( $\Delta n < 0.5$ ), 14 mutations were found to increase the Hill coefficient ( $\Delta n > 0.5$ ), while 10 reduced the Hill coefficient by more than 0.5 units. In this latter category, four mutations (at positions 67, 69, 70, and 220) had a particularly pronounced effect ( $\Delta n > -1$ ), and a structural interpretation of this finding is discussed later. However, because these changes in the  $pH_{0.5}$  and Hill coefficient do not appear to be correlated (Figure S1) and because mechanistic interpretation of the Hill coefficient remains

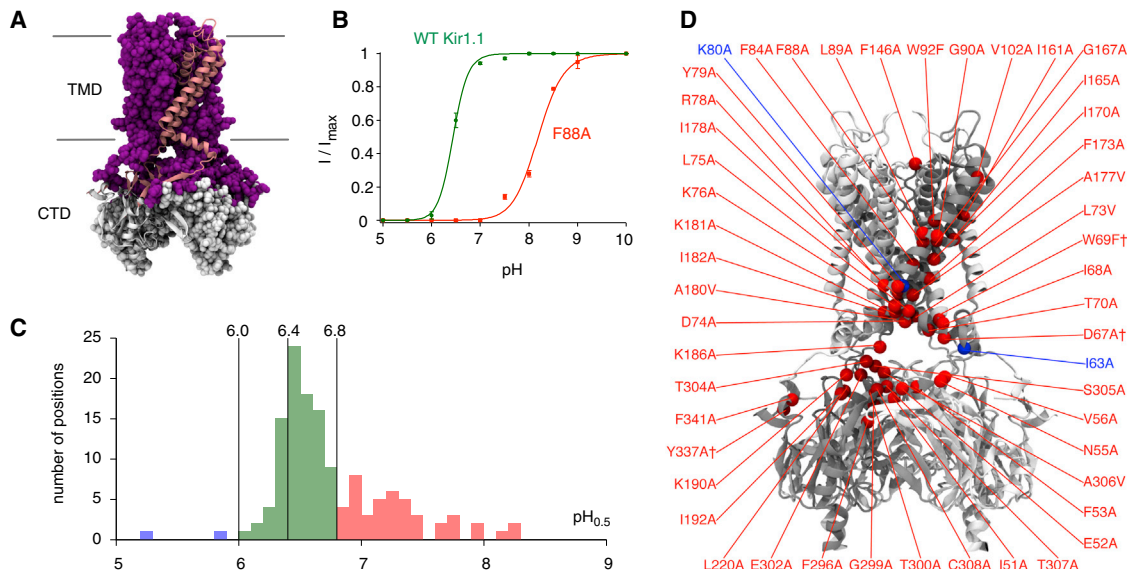

**Figure 1. Mutations in Kir1.1 Preferentially Increase pH Sensitivity**

(A) The TMD and top half of the CTD were systematically mutated at a total of 187 positions (shown in magenta with a single monomer picked out in pink) and their  $pH_{0.5}$  values determined.

(B) The F88A mutant substantially increases pH sensitivity compared to WT Kir1.1. Currents were recorded in giant excised patches over a range of pH values, allowing the  $pH_{0.5}$  value and Hill coefficient ( $n$ ) to be measured. Data points represent mean  $\pm$  SEM.

(C) Mutations at 86 positions had relatively little effect on the  $pH_{0.5}$  value, leading to a shift of less than 0.4 pH units (green). Forty-seven mutants increased the  $pH_{0.5}$  by  $> 0.4$  pH units (red), but only two mutants decreased the  $pH_{0.5}$  value by  $< 0.4$  pH units (blue). No measurement of channel activity was possible for mutants at 52 positions (Table S1).

(D) Mutations for which  $pH_{0.5} > 6.8$  (red) and  $pH_{0.5} < 6.0$  (blue) are mapped onto a single monomer (shown in gray) of a Kir1.1 closed-state model. †Indicates the coexpression with WT mRNA in a 1:1 ratio used to rescue the functional expression.

See also Figure S1 and Movie S1.

controversial (Weiss, 1997), only the observed changes in  $pH_{0.5}$  were considered for further analysis.

### Preferential Destabilization of the Open State

As stated above, 47 of the 49 mutations that altered the pH sensitivity caused an increase in pH sensitivity. Therefore, how can we explain such a large bias in the effect of these mutations? The majority of the  $pH_{0.5} > 6.8$  residues are nontitratable and must therefore have an indirect effect on pH gating. In any protein structure the most likely effect of a mutation is to destabilize that particular structure (Yifrach et al., 2009). Consequently, the biased effect of these mutations suggests that their disruptive effect is far greater on the open state than on the closed state. This will make it easier for  $H^+$  to shift the equilibrium toward the closed state, thus causing an alkaline shift in the pH sensitivity. If this is the case, then these  $pH_{0.5} > 6.8$  residues may be involved in state-dependent interactions that preferentially stabilize the open state, and their perturbatory effect may therefore be related to their physical proximity in the open state.

To determine whether any state-dependent physical interactions exist between these  $pH_{0.5} > 6.8$  residues, we generated homology models of Kir1.1 in the proposed closed, pre-open, and open states. As a template for the closed state, we used the Kir2.2 structure (Protein Data Bank [PDB] 3JYC) (Tao et al., 2009), while the recent  $PIP_2$ -bound structure (PDB 3SPI) (Hansen et al., 2011) was used as template for the pre-open state. To model the open state (i.e., where the bundle crossing gate

is wide enough to allow  $K^+$  permeation), we used a symmetrized model of Kir3.2 in a potentially open conformation (open-Kir3.2 model) where all four subunits have been modeled in the open state (Whorton and MacKinnon, 2011). Full details of how these models were constructed, their relative geometry, the pore radius, and the height and twist of the CTD are described in Table S2.

### Assembly of a State-Dependent Gating-Sensitive Network

The 47  $pH_{0.5} > 6.8$  residues were mapped onto the three different structural models of Kir1.1, and any physical interactions between the residues were then scored. Because the channel is tetrameric, a total of 188 residues (i.e.,  $4 \times 47$ ) were examined for potential intersubunit or intrasubunit interactions, and if  $\geq 2$  residues were found to interact, then this was defined as a “cluster.” In addition to counting H bonds and salt bridges, we determined how close these residues pack by using a probe of 1.0 Å radius rolled over the side chain of each residue to determine its surface area. This also reflects its accessible surface area and contribution to the hydrophobic effect (Richards, 1977). This process was then repeated for each pair of residues (including all possible intrasubunit and intersubunit combinations), and if the total surface area of the pair was less than the combined surface area of each separate residue, then an interaction was scored (see Supplemental Information for further details of the methods involved and Figure S2). We found that

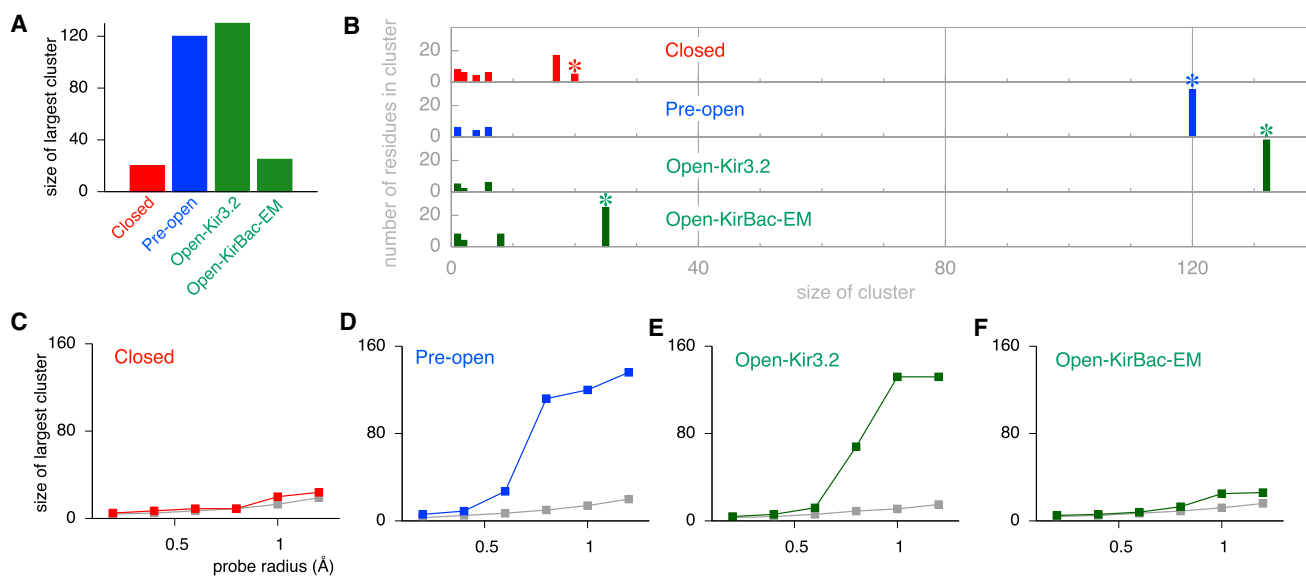

**Figure 2. Gating-Sensitive Residues Interact in a State-Dependent Network**

(A) The size of the largest cluster formed by the 47  $pH_{0.5} > pH 6.8$  residues determined in the closed, pre-open, open-Kir3.2, and open-KirBac-EM models of Kir1.1. Residues interactions were defined as described in the [Supplemental Experimental Procedures](#) by using a probe radius of 1.0 Å.

(B) Distributions in cluster size obtained for the indicated Kir1.1 models. The largest cluster in each model is indicated by an asterisk. Randomly selected residues exhibit clusters of  $\leq 10$  in all models (see also [Figure S3](#)).

(C–F) The size of the largest cluster of  $pH_{0.5} > pH 6.8$  interacting residues plotted against the probe radius used to define a packing interaction in the indicated Kir1.1 models (colored squares); notice that no large clusters are formed in the closed and open-KirBac-EM models residues, but large clusters appear as the probe radius increases to 0.8–1.0 Å in the pre-open and open-state models (see also [Figure S4](#)). Also shown in gray squares is the average size of the largest cluster for an ensemble of 100 models where the 47 positions were chosen randomly out of the 187 investigated positions; notice no larger clusters appear in any of the Kir1.1 models (see also [Figure S5](#)).

the size and distribution of these clusters varied dramatically between the different models of Kir1.1. In the closed state, only a series of smaller clusters was observed, with the largest involving only 20 residues ([Figures 2A and 2B](#)). By contrast, in the pre-open and open-state models, almost two-thirds of the  $pH_{0.5} > 6.8$  residues were found to assemble into a single large cluster or “network” involving between 120 and 132 residues ([Figures 2A and 2B](#)).

Clearly, the outcome of such an analysis will be dependent upon the radius of the probe used: if it is too small, then an analysis of a rigid model will not take into account the thermal motion of the side chains. Likewise, if the probe is too large, then many false positives could arise. To address this, we examined how the size of the largest cluster varied with the radius of the probe used. In the closed state no increase in network size was seen when the probe radius was varied between 0.2 and 1.2 Å ([Figure 2C](#)). However, for both the pre-open and open-state models, there was a sudden and dramatic increase when the probe radius was increased from 0.6 to 0.8 Å ([Figures 2D and 2E](#)). Intriguingly, the crystallographic B factors of several high-resolution ion channel structures indicate that the thermal motion of residues within these structures leads to atomic fluctuations in the range of 0.8 to 1.0 Å ([Halle, 2002; Noskov et al., 2004](#)). Therefore, using a probe radius of 1.0 Å takes such thermal fluctuations into account, which suggests this is a reasonable approach for determining the physical connectivity between residues (see [Figure S4](#) and [Supplemental Information](#) for further details).

### Specificity of Network Assembly

When compared to the closed state, the pre-open and open conformations are more compact due to the upward movement of the CTD and interaction with the TMD. So how can we be sure that the apparent assembly of so many  $pH_{0.5} > 6.8$  residues into a single large network within the pre-open and open states is mechanistically meaningful and not simply a consequence of the more compact nature of these structures?

To rigorously examine this, we made 100 copies of each model, where 47 positions were randomly chosen from those 187 residues mutated within each tetramer, and the same analysis was then repeated. These results, plotted as a function of probe radius ([Figures 2C–2E; Figure S5](#)) show that no large clusters of interactions appear in any of the structural states, even when the probe radius was increased up to 1.2 Å. As a further control, we also generated another open-state model (open-KirBac-EM model) based upon very low-resolution 2D electron microscopy projection images of a prokaryotic Kir channel ([Domene et al., 2005](#)), and the same analysis was then applied. Despite its overall similarity in shape and pore diameter, this low-resolution model is markedly different from more recent Kir/KirBac channel open-state crystal structures and generated cluster sizes no different from randomly selected residues ([Figures 2A and 2F](#)). Together, these controls suggest that the formation of a single large cluster of interacting residues in the pre-open and open state is specific to the selection of these 47  $pH_{0.5} > 6.8$  residues and that with the exception of the open-KirBac-EM model, the structural models used in this

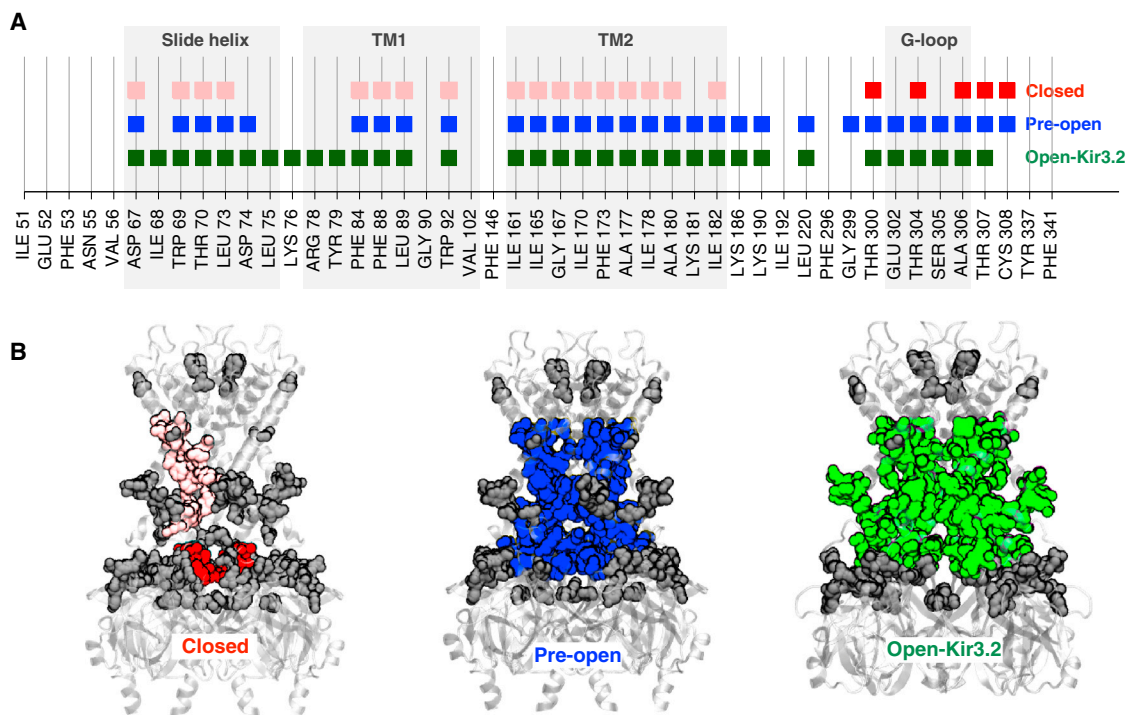

**Figure 3. Assembly of a Large Gating Network in the Pre-Open and Open States**

(A) All 47 identified  $pH_{0.5} > 6.8$  residues are shown on the bottom axis, and those that belong to a network of intermediate or large size are identified by colored squares.

(B) The same residues that form the networks are mapped onto the appropriate structural model of Kir1.1 by using the same coloring scheme. Other  $pH_{0.5} > 6.8$  residues are shown in dark gray. In the closed model there are five networks of intermediate size: one involving the G loop of each monomer (shown in red) and four identical clusters that connect the TM1, TM2, and slide helices (only one is shown for clarity, in pink). As the CTD moves upward, these smaller clusters fuse together in the pre-open model, forming a single large network spanning all four monomers (blue). This connects the TMD to the G loop and the CTD, and almost all these residues remain connected in the open state (green).

See also [Movie S2](#) and [Figure S6](#).

analysis represent functionally relevant conformations within the Kir1.1 channel gating pathway.

### Structural Basis of the pH-Dependent Gating Step

Comparison of these different gating conformations also revealed a high degree of overlap in the identity of gating-sensitive  $pH_{0.5} > 6.8$  residues found in each network and provides some insight into how this network might assemble (or break down) as the channel moves back and forth between these different conformations ([Figure 3A](#)). In both the pre-open and open states, this consensus involves residues from the slide helix, TM1 and transmembrane helix 2 (TM2) of the TMD, and also the G loop, which all then become fused together into a single large intersubunit and intrasubunit network. The residues involved do not differ substantially between these two states. Interestingly, many of these same residues also contribute to clusters in the closed state. However, in the closed state the single large network is broken down into a series of smaller intrasubunit and intersubunit clusters ([Figure 3B](#); [Movie S2](#)). In the closed state the largest individual cluster is located within the CTD where 5 residues within each of the 4 G loops contribute to a cluster of 20 residues. The second largest network in the closed state involves 4 identical (but physically separate) clusters of 17 residues within the TMD. Comparison of these different

open and closed conformations indicates that the upward movement of the CTD allows assembly of these five preexisting clusters into the single large network in the pre-open and open states ([Figure 3B](#); [Movie S2](#)).

Importantly, the fact that this large gating-sensitive network does not appear to differ substantially between the pre-open and open states indicates that the greatest change in physical connectivity between the  $pH_{0.5} > 6.8$  residues occurs during the transition between the closed and pre-open states. Therefore, it seems likely that this transition between closed and pre-open states represents the pH-dependent gating step most affected by the  $pH_{0.5} > 6.8$  residues (see [Discussion](#)).

### Double Mutant Cycle Analysis Reveals Long-Range Allosteric Coupling

Double mutant cycle analysis can be used to determine the independence or dependence of the functional effects of two or more individual mutations on the function of a protein ([Maksay, 2011](#); [Yifrach et al., 2009](#)). For example, if two separate regions both undergo independent, localized conformational changes that contribute to pore opening, then mutations in these two regions should have independent (i.e., energetically additive) effects. Alternatively, a larger, more concerted conformational change might involve coupling between distant regions of the

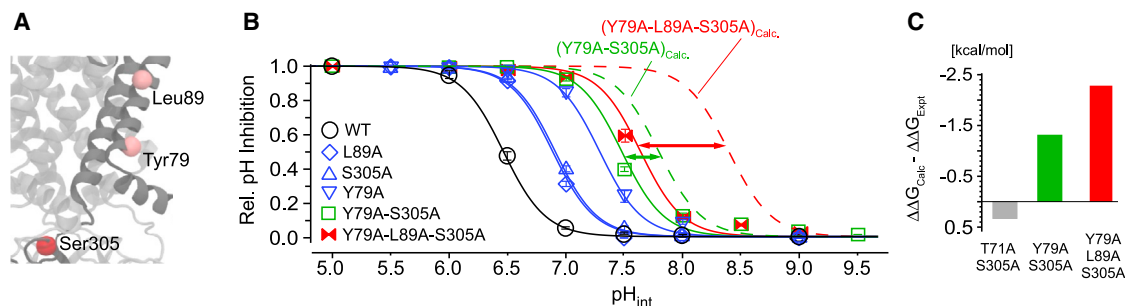

**Figure 4. Mutant Cycle Analysis Reveals Long-Range Thermodynamic Coupling**

(A) Location of network mutations L89A, Y79A (TM1), and S305A (G loop) in the open-Kir3.2 model.

(B) The pH sensitivity of WT and indicated mutants. Calculated dose-response curves for double and triple mutants are also shown assuming no thermodynamic coupling (see [Experimental Procedures](#)). Data points represent mean  $\pm$  SEM.

(C) Thermodynamic coupling between indicated mutations was determined as the difference between the calculated  $\Delta\Delta G_{Calc}$  and experimental  $\Delta\Delta G_{Expt}$  values for indicated double and triple mutants. Note that thermodynamic coupling increases with the addition of L89A on Y79A-S305A. The T71A mutant is used as a control because this mutation is not within the network and exhibits WT pH sensitivity. The T71A-S305A double mutant exhibits no coupling.

protein. In this case, even though far apart, mutations in these two regions would have nonadditive effects on gating ([Yifrach and MacKinnon, 2002](#)). Based upon these assumptions, our prediction was that combinations of mutations within this gating network would show energetic coupling even though they might be far apart within the structure.

To test this we combined two different mutations in TM1 (Y79A:  $pH_{0.5} = 7.3 \pm 0.1$ ,  $n = 2.5 \pm 0.1$ ; L89A:  $pH_{0.5} = 6.9 \pm 0.1$ ,  $n = 2.6 \pm 0.1$ ) with a mutation within the G loop (S305A:  $pH_{0.5} = 6.9 \pm 0.1$ ,  $n = 2.5 \pm 0.1$ ) ([Figure 4A](#)). If their effect on pH gating is additive (i.e., not energetic coupled), then the respective double mutants should have  $pH_{0.5}$  values corresponding to the sum of the pH shifts of the individual mutants. For example, assuming there is no change in the Hill coefficient, then for the Y79A-S305A double mutant, a  $pH_{0.5}$  value of 7.8 would be expected if the mutations were purely energy additive. However, we found that the Y79A-S305A Kir1.1 channels had a  $pH_{0.5}$  value of 7.5. Moreover, if we added a third mutation (L89A) to the Y79A-S305A double mutant, the  $pH_{0.5}$  was shifted to 7.6, whereas a value of 8.3 would be expected if these three mutations were not coupled ([Figure 4B](#)). In more quantitative terms the magnitude of nonadditivity of the double mutants can also be calculated (see [Experimental Procedures](#)). The resulting  $\Delta\Delta G_{(open-closed)}$  values for Y79A-S305A and Y79A-L89A-S305A were  $-1.3$  kcal/mol and  $-2.3$  kcal/mol, respectively. However, when S305A within the G loop was combined with a control mutation that does not alter pH gating (T71A), then the  $\Delta\Delta G_{(open-closed)}$  value was marginal (0.3 kcal/mol). Comparison between the experimentally determined ( $\Delta\Delta G_{Expt}$ ) and calculated ( $\Delta\Delta G_{Calc}$ ) values demonstrates that residues within the gating network can couple energetically over large distances ([Figure 4C](#) and [Discussion](#)).

#### Clustering of Mutations that Reduce the Hill Coefficient

There is little functional correlation between mutations that affect  $pH_{0.5}$  and their effect on the Hill coefficient ([Figure S1](#)). Furthermore, those mutations that increased the Hill coefficient appear to be scattered throughout the Kir1.1 structure. However, examination of the four mutations (D67A, W69F, T70A, and L220A) that produced the largest reduction in Hill coefficient

( $\Delta n > -1$ ) appears to provide some mechanistic insight. Asp67, Trp69, and Thr70 are located within the slide helix at the TMD-CTD interface and are involved in the fusion of several smaller clusters within the closed state into the single large network seen in the pre-open and open states ([Figure 5](#)). Furthermore, Leu220 is located on the CD loop of the CTD and comes into close proximity to Thr70 when the channel switches from the pre-open state to the open state. Thus, the marked reduction in the Hill coefficient observed for these four mutations appears to correlate with their involvement in a state-dependent inter-subunit interaction and also suggests that this region may be critical for subunit cooperativity during the pore opening step.

## DISCUSSION

In this study we have revealed a large number of “gating-sensitive” residues that have a marked preference for destabilization of the open state. Furthermore, reconstruction of a structural gating pathway for Kir1.1 also revealed that most of these gating-sensitive residues assemble into a large physically connected network found only in the open and pre-open states. Mutagenic perturbation of this state-dependent network therefore provides a straightforward explanation for the increase in pH sensitivity observed in these mutants and suggests that intracellular pH gating may control the transition between the pre-open and closed conformations.

#### Structural Optimization of the Open State

One of the most remarkable findings of this study was the functionally biased effect of mutations on the pH gating of Kir1.1, i.e., 47 of the 135 functional mutations increased the pH sensitivity, whereas only 2 mutations decreased pH sensitivity. Assuming that the calculated  $pH_{0.5}$  value broadly reflects the difference in free energy between the open and closed states (and that mutations generally have a destabilizing effect on protein structures), we therefore conclude that the open state is more sensitive to mutagenic perturbation than the closed state. Interestingly, scanning mutagenesis of the TM helices of the voltage-gated *Shaker* channel revealed a different picture ([Yifrach and MacKinnon, 2002](#)). In that study, most mutations preferentially

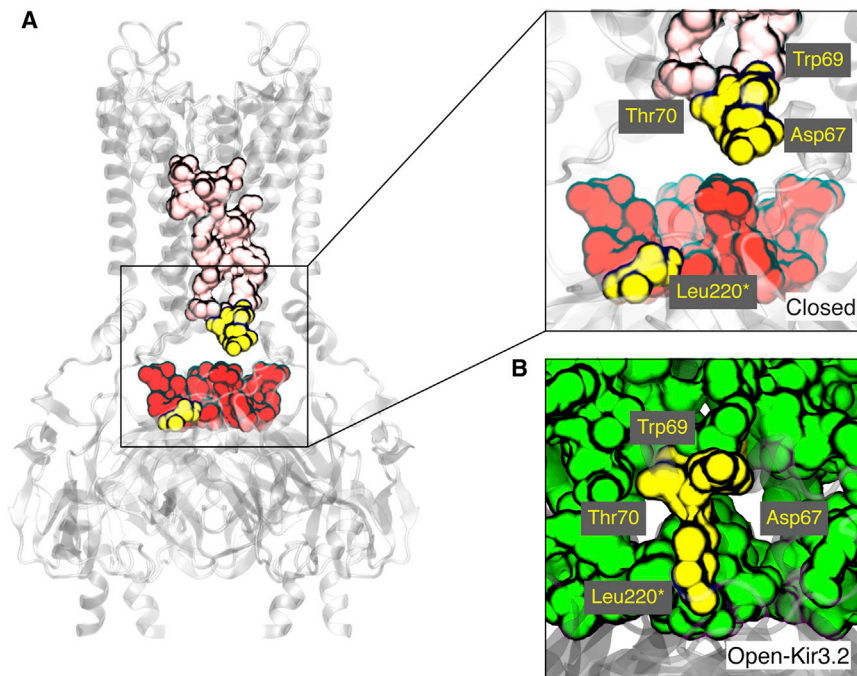

**Figure 5. Intersubunit Interactions Affect Subunit Cooperativity**

Asp67, Trp69, and Thr70 on the slide helix and Leu220 on the CD loop of the CTD all shift the  $pH_{0.5} > 6.8$  and also significantly reduce the Hill coefficient ( $\Delta n > -1$ ). They are separated by a large distance in the closed model (A), but come together in the open-Kir3.2 model (B) to form a connection between the TMD and the CTD. For context, the large networks are shown as in Figure 4B. Leu220 is indicated by an asterisk to denote this residue belongs to an adjacent subunit and represents part of an intersubunit interaction (see also Figure S1).

large distances in a protein (Sadovsky and Yifrach, 2007; Yifrach et al., 2009). Thus, in addition to any local effect, a mutation at one position can affect many other distant residues within the protein. We therefore propose that the enhanced connectivity of this network in the open (and pre-open) state enhances the perturbatory effect of a single mutation by allowing it to spread much wider than in

the smaller more fragmented networks of the closed state, thereby causing an increased level of network destabilization as illustrated in Figure 6.

### Assembly of a State-Dependent Gating Network

Our analysis of the physical interactions between the 47 gating-sensitive residues found that most are involved in either intersubunit or intrasubunit interactions with other  $pH_{0.5} > 6.8$  residues. However, although many of these interactions occurred in all three different structural states (i.e., closed, pre-open, and open), we found a remarkable difference in the relative size of the networks involved; in the closed state, only a series of smaller clusters are observed, whereas in the pre-open and open-state models a large cluster of up to 132 residues is found. The principal structural reason for this dramatic increase in network size is the upward movement of the CTD as it engages with the TMD in the pre-open state. This transition then fuses the smaller preexisting clusters found in the closed state into a larger single network of intersubunit and intrasubunit interactions that spans across the membrane from the G loop up toward the selectivity filter (Figure 3; Movie S2).

### Network Connectivity Determines State Stability and Mutagenic Sensitivity

How does the apparently biased effect of mutations on the pH sensitivity of Kir1.1 correlate with their assembly into a large gating-sensitive network in the pre-open and open states? It is possible that the local impact of mutating these gating-sensitive residues might not exhibit any state dependence, thus the local destabilization might be similar in all states. However, it is well established that residues can be energetically coupled over

the smaller more fragmented networks of the closed state, thereby causing an increased level of network destabilization as illustrated in Figure 6.

This concept is supported by our finding that distant residues within the gating network show strong thermodynamic coupling (Figure 4). Although such coupling could potentially result in either an increase or decrease in the combined effect, the negative values observed for this thermodynamic coupling are consistent with the concept of the gating network stabilizing the open (and pre-open) state, but not the closed state because an existing mutation within the network will reduce the destabilizing effect of a second (or even third) additional mutation. In other words, if the network is already destabilized by mutagenesis, then the impact of further mutations on the open state will be reduced and become more similar to the impact of the mutation on the closed state. As a consequence, the impact of the mutation on the state equilibrium (i.e., pH sensitivity) vanishes.

It therefore seems reasonable to propose that the thermodynamic coupling we observe is physically transmitted via interactions within the network. This not only provides a structural explanation for the observed mutagenic sensitivity of the Kir1.1 open state but may also highlight a general property of residues within allosteric proteins, i.e., their state-dependent physical connectivity.

### Functional Validation of a Gating Pathway

X-ray crystallography has resolved the structure of Kir2.2 in three different structural states, i.e., the closed, pre-open, and open states. However, it is not clear per se whether these crystallographically defined structures are physiological relevant within the native membrane. For instance, how do we know whether the closed state is similar to the native closed state of a Kir channel other than its narrow pore diameter?

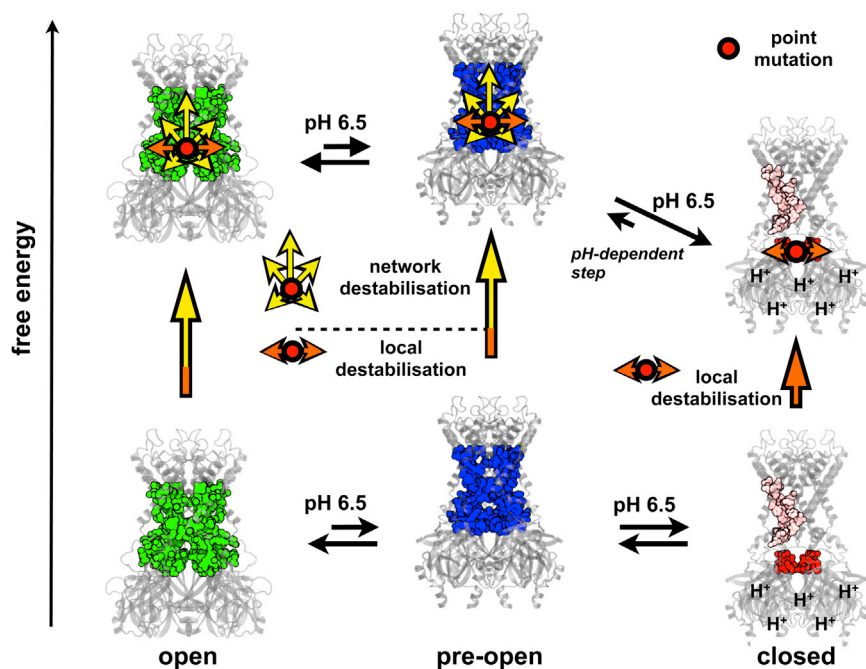

**Figure 6. Impact of a Network Mutation on the Gating of Kir1.1**

Cartoon depicting the assumed free energies of the different conformational states of Kir1.1 at pH 6.5, i.e., the equilibrium point where the open and close states are about equally populated (bottom row). The gating network residues are highlighted in green (open state), in blue (pre-open state), and in red (the closed state). Note that the gating network in the closed state is fragmented into smaller clusters. Mutation of a gating network residue (red dot) will have a local destabilizing effect (local destabilization, orange arrows) on all states. However, it will have a larger effect on the open and pre-open states due to greater connectivity of the gating network (network destabilization, yellow arrows) in these states compared to the closed state. This raises the free energy of the pre-open and open states relative to the closed state and leads to a redistribution in the relative population of states. The closed state now becomes more energetically favorable and therefore more frequently populated, thereby explaining the increased pH sensitivity observed for mutations within this network.

The data we present here provide functional validation of the closed-state and pre-open-state conformations as well as the proposed open state. This conclusion is supported by the following observations. First, all of the gating-sensitive residues are located within those regions that undergo structural changes between the different crystallographic states. Second, our method of determining this gating network was sensitive to both the nature of the structural template used (no such network was found in the low-resolution open-KirBac-EM structure) as well as the exact selection of residues (100 different sets of randomly selected residues failed to reproduce this network). In other words, our functional data validate these structural models and give confidence that they represent a plausible Kir channel gating pathway.

### Pathophysiological Implications

Our results may also explain why so many mutations in Kir1.1 give rise to type II Bartters syndrome. This salt-wasting renal tubulopathy is caused by a variety of mutations in Kir1.1 that result in a loss of function (Hibino et al., 2010). Intriguingly, a number of Bartters mutations have been shown to produce an alkaline shift in pH sensitivity resulting in a loss of function at physiological pH, and several of these mutant residues (e.g., Asp74, Ala177, and Ala306; Hibino et al., 2010) are found within the network of gating-sensitive residues identified in this study. Their effects on pH sensitivity are therefore likely to be the result of destabilizing this gating network. Furthermore, loss of function mutations due to an alkaline shift in  $pH_{0.5}$  in the related Kir4.1 channel have also been shown to underlie another tubulopathy (SeSAME/EAST syndrome) (Bandulik et al., 2011), and it is possible that a similar network effect may also exist in this channel.

In summary, our systematic scanning mutagenesis approach now provides an insight into the structural and energetic land-

scape of the Kir1.1 channel gating pathway. This integrated approach of computational and functional analysis has identified a large network of physically connected residues that preferentially stabilizes the pre-open and open states of the channel and highlights the structural basis of the pH-dependent gating transition. Importantly, this analysis would not have been possible without the comprehensive nature of the scanning mutagenesis undertaken. Had our analysis been restricted to fewer residues or one particular conformation, then structural interpretation of these mutations would have been limited. Our results also provide evidence that the physical network connectivity of state-sensitive residues may represent a structural mechanism for thermodynamic coupling between distant sites in a protein. Furthermore, they suggest that the thermodynamic consequences of mutagenic perturbation in a particular state are related to the degree of network connectivity. Further studies will have to show whether this is a general property of allosteric proteins, but we anticipate that substantial (i.e., global) structural changes will be required to cause large changes in physical network connectivity as seen here in Kir channel gating. It is inevitable that more ion channel structures in multiple different conformational states will become available. This study therefore demonstrates that similar comprehensive analytical approaches may emerge as a worthwhile approach to better understand the thermodynamic consequences of structural changes in other allosteric proteins.

### EXPERIMENTAL PROCEDURES

#### Molecular Biology and Electrophysiology

Mutagenesis of rat Kir1.1a in the pBF oocyte expression vector was performed using the QuikChangeII system (Agilent). The mRNAs were synthesized using the SP6 mMESSAGE mMACHINE kit (Ambion). Manually defolliculated *Xenopus* oocytes were injected with 2–5 ng mRNA, and the intracellular pH sensitivity was determined from giant patches in inside-out configuration



under voltage clamp conditions 3–7 days after mRNA injection. Pipettes were made from thick-walled borosilicate glass, had resistances of 0.3–0.9 M $\Omega$  (tip diameter of 5–15  $\mu$ m), and were filled with (in mM, pH adjusted to 7.2 with KOH) 120 KCl, 10 HEPES, and 1.8 CaCl<sub>2</sub>. Currents were sampled at 1 kHz with an analog filter set to 3 kHz (–3dB). Solutions were applied to excised patches via a multibarrel pipette and had the following composition (in mM): 120 KCl, 10 HEPES, and 2 K<sub>2</sub>EGTA, adjusted to the appropriate pH with HCl. The pH dose–response curves were determined as described above (Rapedius et al., 2007b). For the thermodynamic coupling analysis shown in Figure 5,  $\Delta\Delta G_{\text{Calc}}$  values were calculated assuming that single mutations are energetically additive when combined, i.e.,  $\Delta\Delta G_{(\text{double mutation})\text{Calc}} = \Delta G_{(\text{first mutation})} + \Delta G_{(\text{second mutation})}$  and  $\Delta\Delta G_{(\text{triple mutation})\text{Calc}} = \Delta G_{(\text{first mutation})} + \Delta G_{(\text{second mutation})} + \Delta G_{(\text{third mutation})}$ . The  $\Delta G_{\text{Expt}}$  values were calculated from the experimentally determined values according to the equation  $\Delta\Delta G_{\text{Expt}} = 2.3 RTn [\text{pH}_{0.5(\text{mutant-double/triple})} - \text{pH}_{0.5(\text{WT})}]$ . The Hill coefficient (*n*) was 2.4 for WT and between 2.3 and 2.6 for all mutants; therefore, it was set to 2.4 for all fits.

### Homology Modeling and Analysis

The closed and pre-open models of Kir1.1 were built using Modeler 9v8 (Sali and Blundell, 1993) primarily from structures of cKir2.2 (Hansen et al., 2011; Tao et al., 2009). The open-Kir3.2 and open-KirBac-EM models were built using open structures of Kir3.2 and a model of KirBac1.1 built using low-resolution EM maps (Domene et al., 2005; Hansen et al., 2011). The coordinates of the models along with more details of the process, including a sequence alignment, can be found in the Supplemental Information. The measured values of the  $\text{pH}_{0.5}$  and Hill coefficient are stored in the BETA and OCCUPANCY fields, respectively. The 47  $\text{pH}_{0.5} > 6.8$  residues were then mapped onto these structures, and hydrogen bonds and salt bridges were detected by using VMD (Humphrey et al., 1996). In addition, residues were assessed as packing against one another by using a probe of variable radius. More details on this along with a discussion of relating the radius of the probe to Debye–Waller B factors can be found in the Supplemental Information. Graphs were then constructed using NetworkX (Hagberg et al., 2008), where residues were nodes and interactions between them formed edges. The distribution of cluster sizes was then analyzed and plotted.

### SUPPLEMENTAL INFORMATION

Supplemental Information includes Supplemental Experimental Procedures, six figures, two tables, and two movies and can be found with this article online at <http://dx.doi.org/10.1016/j.str.2014.04.018>.

### ACKNOWLEDGMENTS

We thank the MacKinnon laboratory for providing the coordinates of the open model of Kir3.2 generated from PDB 3SYQ. This work was supported by research grants from the Deutsche Forschungsgemeinschaft, the Wellcome Trust, and the British Heart Foundation.

Received: January 14, 2014

Revised: April 5, 2014

Accepted: April 7, 2014

Published: June 26, 2014

### REFERENCES

Alam, A., and Jiang, Y. (2009). High-resolution structure of the open NaK channel. *Nat. Struct. Mol. Biol.* 16, 30–34.

Bandulik, S., Schmidt, K., Bockenbauer, D., Zdebik, A.A., Humberg, E., Kleta, R., Warth, R., and Reichold, M. (2011). The salt-wasting phenotype of EAST syndrome, a disease with multifaceted symptoms linked to the KCNJ10 K<sup>+</sup> channel. *Pflugers Arch.* 461, 423–435.

Bavro, V.N., De Zorzi, R., Schmidt, M.R., Muniz, J.R., Zubcevic, L., Sansom, M.S., Vénien-Bryan, C., and Tucker, S.J. (2012). Structure of a KirBac potassium channel with an open bundle crossing indicates a mechanism of channel gating. *Nat. Struct. Mol. Biol.* 19, 158–163.

Clarke, O.B., Caputo, A.T., Hill, A.P., Vandenberg, J.I., Smith, B.J., and Gulbis, J.M. (2010). Domain reorientation and rotation of an intracellular assembly regulate conduction in Kir potassium channels. *Cell* 141, 1018–1029.

Cuello, L.G., Jogini, V., Cortes, D.M., Pan, A.C., Gagnon, D.G., Dalmas, O., Cordero-Morales, J.F., Chakrapani, S., Roux, B., and Perozo, E. (2010). Structural basis for the coupling between activation and inactivation gates in K<sup>(+)</sup> channels. *Nature* 466, 272–275.

Domene, C., Doyle, D.A., and Vénien-Bryan, C. (2005). Modeling of an ion channel in its open conformation. *Biophys. J.* 89, L01–L03.

Hagberg, A., Schult, D.A., and Swart, P.J. (2008). Exploring network structure, dynamics and function using NetworkX. G. Varoquaux, T. Vaught, and J. Millman, eds. *Proceedings of the 7th Python in Science Conference (SciPy2008)*, 11–15.

Halle, B. (2002). Flexibility and packing in proteins. *Proc. Natl. Acad. Sci. USA* 99, 1274–1279.

Hansen, S.B., Tao, X., and MacKinnon, R. (2011). Structural basis of PIP2 activation of the classical inward rectifier K<sup>+</sup> channel Kir2.2. *Nature* 477, 495–498.

Hibino, H., Inanobe, A., Furutani, K., Murakami, S., Findlay, I., and Kurachi, Y. (2010). Inwardly rectifying potassium channels: their structure, function, and physiological roles. *Physiol. Rev.* 90, 291–366.

Humphrey, W., Dalke, A., and Schulten, K. (1996). VMD: visual molecular dynamics. *J. Mol. Graph.* 14, 33–38, 27–38.

Logothetis, D.E., Jin, T., Lupyán, D., and Rosenhouse-Dantsker, A. (2007). Phosphoinositide-mediated gating of inwardly rectifying K<sup>(+)</sup> channels. *Pflugers Arch.* 455, 83–95.

Maksay, G. (2011). Allosteric in pharmacology: thermodynamics, evolution and design. *Prog. Biophys. Mol. Biol.* 106, 463–473.

Noskov, S.Y., Bernèche, S., and Roux, B. (2004). Control of ion selectivity in potassium channels by electrostatic and dynamic properties of carbonyl ligands. *Nature* 431, 830–834.

Paynter, J.J., Shang, L., Bollepalli, M.K., Baukowitz, T., and Tucker, S.J. (2010). Random mutagenesis screening indicates the absence of a separate H<sup>(+)</sup>-sensor in the pH-sensitive Kir channels. *Channels (Austin)* 4, 390–397.

Prevost, M.S., Sauguet, L., Nury, H., Van Renterghem, C., Huon, C., Poitevin, F., Baaden, M., Delarue, M., and Corringer, P.J. (2012). A locally closed conformation of a bacterial pentameric proton-gated ion channel. *Nat. Struct. Mol. Biol.* 19, 642–649.

Rapedius, M., Haider, S., Browne, K.F., Shang, L., Sansom, M.S., Baukowitz, T., and Tucker, S.J. (2006). Structural and functional analysis of the putative pH sensor in the Kir1.1 (ROMK) potassium channel. *EMBO Rep.* 7, 611–616.

Rapedius, M., Fowler, P.W., Shang, L., Sansom, M.S., Tucker, S.J., and Baukowitz, T. (2007a). H bonding at the helix-bundle crossing controls gating in Kir potassium channels. *Neuron* 55, 602–614.

Rapedius, M., Paynter, J.J., Fowler, P.W., Shang, L., Sansom, M.S., Tucker, S.J., and Baukowitz, T. (2007b). Control of pH and PIP2 gating in heteromeric Kir4.1/Kir5.1 channels by H-Bonding at the helix-bundle crossing. *Channels (Austin)* 1, 327–330.

Richards, F.M. (1977). Areas, volumes, packing and protein structure. *Annu. Rev. Biophys. Bioeng.* 6, 151–176.

Sadovsky, E., and Yifrach, O. (2007). Principles underlying energetic coupling along an allosteric communication trajectory of a voltage-activated K<sup>+</sup> channel. *Proc. Natl. Acad. Sci. USA* 104, 19813–19818.

Sali, A., and Blundell, T.L. (1993). Comparative protein modelling by satisfaction of spatial restraints. *J. Mol. Biol.* 234, 779–815.

Tao, X., Avalos, J.L., Chen, J., and MacKinnon, R. (2009). Crystal structure of the eukaryotic strong inward-rectifier K<sup>+</sup> channel Kir2.2 at 3.1 Å resolution. *Science* 326, 1668–1674.

Tucker, S.J., and Baukowitz, T. (2008). How highly charged anionic lipids bind and regulate ion channels. *J. Gen. Physiol.* 131, 431–438.

- Weiss, J.N. (1997). The Hill equation revisited: uses and misuses. *FASEB J.* *11*, 835–841.
- Whorton, M.R., and MacKinnon, R. (2011). Crystal structure of the mammalian GIRK2 K<sup>+</sup> channel and gating regulation by G proteins, PIP2, and sodium. *Cell* *147*, 199–208.
- Whorton, M.R., and MacKinnon, R. (2013). X-ray structure of the mammalian GIRK2-βγ G-protein complex. *Nature* *498*, 190–197.
- Yifrach, O., and MacKinnon, R. (2002). Energetics of pore opening in a voltage-gated K(+) channel. *Cell* *111*, 231–239.
- Yifrach, O., Zandany, N., and Shem-Ad, T. (2009). Examining cooperative gating phenomena in voltage-dependent potassium channels: taking the energetic approach. *Methods Enzymol.* *466*, 179–209.
- Zagotta, W.N., Hoshi, T., and Aldrich, R.W. (1994). Shaker potassium channel gating. III: Evaluation of kinetic models for activation. *J. Gen. Physiol.* *103*, 321–362.
- Zhang, Y.Y., Sackin, H., and Palmer, L.G. (2006). Localization of the pH gate in Kir1.1 channels. *Biophys. J.* *91*, 2901–2909.

**Structure, Volume 22**

## **Supplemental Information**

### **State-Dependent Network Connectivity**

#### **Determines Gating in a K<sup>+</sup> Channel**

**Murali K. Bollepalli, Philip W. Fowler, Markus Rapedius, Lijun Shang, Mark S.P. Sansom, Stephen J. Tucker, and Thomas Baukrowitz**

# State-Dependent Network Connectivity Determines Gating in a K<sup>+</sup> Channel – Supplementary Material

Murali K. Bollepalli\*<sup>1,6</sup>, Philip W. Fowler\*<sup>2</sup>, Markus Rapedius<sup>1</sup>, Lijun Shang<sup>3,5</sup>, Mark S. P. Sansom<sup>2,4</sup>, Stephen J. Tucker<sup>3,4</sup> and Thomas Baukrowitz<sup>1</sup>

1. Physiological Institute, Christian-Albrechts University, 24118 Kiel, Germany
2. Department of Biochemistry, University of Oxford, Oxford, OX1 3QU, UK
3. Clarendon Laboratory, Department of Physics, University of Oxford, Oxford, OX1 3PU, UK
4. OXION Ion Channel Initiative, University of Oxford, Oxford, OX1 3PT, UK
5. Present address: School of Medical Sciences, Bradford University, Bradford, BD7 1DP, UK
6. Present address: Department of Physiology, Development and Neuroscience, University of Cambridge, Cambridge, CB2 3EG, UK

MKB and PWF contributed equally to this study.

Correspondence should be addressed to TB<sup>1</sup> or SJT<sup>2</sup>.

## Contents

|          |                                                                                          |          |
|----------|------------------------------------------------------------------------------------------|----------|
| <b>1</b> | <b>Supplementary Methods</b>                                                             | <b>3</b> |
| 1.1      | Construction of closed, pre-open and open Kir1.1 homology models . . . . .               | 3        |
| 1.2      | Characterization of the closed, pre-open and open Kir1.1 models . . . . .                | 3        |
| 1.3      | Analysis of the closed, pre-open and open Kir1.1 models . . . . .                        | 4        |
| 1.4      | Relating the probe radius to the predicted atomic root mean square fluctuation . . . . . | 5        |
| <b>2</b> | <b>Supplementary Tables</b>                                                              | <b>6</b> |
| <b>3</b> | <b>Supplementary Movies</b>                                                              | <b>6</b> |
| <b>4</b> | <b>Supplementary Figures 1–6</b>                                                         | <b>6</b> |

---

<sup>1</sup>t.baukrowitz@physiologie.uni-kiel.de

<sup>2</sup>stephen.tucker@physics.ox.ac.uk

## List of Figures

|    |                                                                                                                                                                                      |    |
|----|--------------------------------------------------------------------------------------------------------------------------------------------------------------------------------------|----|
| S1 | Lack of clear correlation between the $\text{pH}_{0.5}$ and the Hill coefficients (refers to Figure 1 and Figure 5).                                                                 | 10 |
| S2 | Schematic illustrating how homology models were built and analysed (refers to Experimental Procedures and Figure 2) . . . . .                                                        | 11 |
| S3 | Large clusters form in the Pre-open and Open-Kir3.2 models (refers to Figure 2B) . . . . .                                                                                           | 12 |
| S4 | Average RMSFs predicted from Debye-Waller crystallographic $B$ -factors for three high resolution ion channel structures (refers to Experimental Procedures and Figure 2B) . . . . . | 13 |
| S5 | Clustering of $\text{pH}_{0.5} > 6.8$ positions (refers to Experimental Procedures and Figures 2C-F) . . . . .                                                                       | 14 |
| S6 | Alignment used to build the homology models (refers to Figure 3) . . . . .                                                                                                           | 15 |

## 1 Supplementary Methods

### 1.1 Construction of closed, pre-open and open Kir1.1 homology models

We built a closed, a pre-open and two open homology models of Kir1.1 using the available experimental structures of inwardly-rectifying potassium channels. The closed and pre-open models of Kir1.1 used the structures of chicken Kir2.2 without<sup>1</sup> (PDB:3JYC, resolution 3.1 Å) and with<sup>2</sup> PIP<sub>2</sub> (PDB:3SPI, resolution 3.3 Å) bound. One of the two open homology models used the structure of Kir3.2<sup>4</sup>, whilst the other was based on and a published model of KirBac1.1<sup>5</sup>.

The crystallographic unit cell of R201A Kir3.2 with PIP<sub>2</sub> bound (PDB:3SYQ, resolution 3.5 Å) contains two monomers, one with PIP<sub>2</sub> bound and one without, resulting in a tetramer with only two-fold symmetry<sup>4</sup>. We used a symmetric tetramer with four-fold symmetry built using only the more open PIP<sub>2</sub>-bound monomer coordinates supplied by the MacKinnon laboratory. Neither this structure nor the model of KirBac1.1 derived from 2D electron microscopy data<sup>5</sup> are complete templates for Kir1.1 and hence the Open-Kir3.2 and Open-KirBac-EM models required multiple templates (**Table S2**). The N-terminus of the Open-Kir3.2 model (residues 49-67 incl., Kir1.1 numbering) was modelled using the more open chimeric Kir/KirBac structure (PDB:2QKS, resolution 2.2 Å)<sup>6</sup>. For both models the long extracellular loop present in Kir1.1 (residues 104-120 incl.) was modelled using the closed structure of chicken Kir2.2 (PDB: 3JYC)<sup>1</sup>. The multiple alignment between Kir1.1 and all the homologs is shown in Figure S6. The quality of the alignment is good with many conserved sequences in both the pore and C-terminal domains.

We then used Modeller 9v8<sup>7</sup> to build the four homology models of Kir1.1. If more than one homolog was used, these were first structurally aligned using VMD<sup>8</sup> before being input into Modeller. The fragments were structurally aligned using the last or first 4 residues. All numbering below is for Kir1.1. Modeller enforced both the disulphide bond between Cys-121 and Cys-153 and the salt bridge between Glu-137 and Arg-147. The slide (residues 64-74), M1 (residues 77-104) and M2 (residues 154-183) helices were all constrained to be helical and finally the four chains were also constrained to be symmetrical. Fifty models were built and the best one was selected by examining both the reported energy and the number of residues in disfavoured and disallowed regions of the Ramachandran plot, as assessed by the RAMPAGE server<sup>9</sup>. Hydrogens were then added using the pdb2gmx module of GROMACS<sup>10</sup>. Each model of Kir1.1 contained at a minimum residues 49-350.

### 1.2 Characterization of the closed, pre-open and open Kir1.1 models

But which model is the most open at the helix bundle crossing and how do the positions of the C-terminal domain change? To provide an approximate answer to these questions we measured a series of parameters for each model

given in Table S2. These are (i) the distance between the A180 C $\alpha$  atoms in TM2, (ii) the average pore radius and the (iii) twist and (iv) height of the CTD. We chose A180 as it is the equivalent residue to T112 in KcsA and so enables comparison with the range of open KcsA structures<sup>11</sup>. The distance between the A180 C $\alpha$  atoms therefore gives a crude estimate of how far apart the M2 helices are and therefore how open is the helix bundle crossing. The average pore radius provides a more accurate assessment; first how the pore radius varies along the channel is estimated by HOLE<sup>12</sup>. We define the average pore radius as the average of the pore radius over a 7 Å window centered on the position of C $\alpha$  of A180. This value can be compared to theoretical studies of hydrophobic pores<sup>13</sup>. The values suggest that both the helix bundle crossing of the closed and pre-open models of Kir1.1 are in all likelihood impermeable to potassium ions whereas the three open models are most probably permeable. We then assume the C-terminal domain can be approximated as a rigid body and measure its movement relative to the closed model of Kir1.1. Any rotation about the pore axis is measured by examining the movement of center of mass of the C $\alpha$  atoms of the  $\beta$ -loop of one monomer (residues 329 to 339 incl, Kir1.1. numbering). We assessed the movement upwards towards the membrane of the C-terminal domain by examining the movement of the center of mass of all four G-loops (residues 302-305 incl.). These metrics show what we expect, i.e. that the C-terminal domains of all models except the closed model are closer to the membrane and the CTDs of the open models are twisted by 10-30° compared to the closed model.

### 1.3 Analysis of the closed, pre-open and open Kir1.1 models

The 47 residues that shift the pH<sub>0.5</sub> by more than 0.4 pH units were first mapped onto each of the five models. The proximity and interactions between all 188 (4 × 47) residues were then analysed. First all hydrogen bonds between the residues are calculated. We assumed a hydrogen bond to have formed if the distance between the donor and acceptor was less than 3.8 Å and the angle subtended by the donor, hydrogen and acceptor was less than 60°. Salt bridges were assumed to have formed if the sidechains of acidic and basic residues are separated by less than 3.8 Å. Finally, proximity between two residues was tested by first calculating the accessible surface area of each sidechain using a probe of varying radius (A and B) and then calculating the accessible surface area (ASA) of both sidechains together (C). If  $(A + B) > C$  then we assume the two residues are packing against one another. The effect of varying the probe radius in the range 0.2-1.2 Å was examined and we decided on a probe radius of 1.0 Å by comparing the probe radius to the predicted thermal fluctuation (see below). This analysis was also done using VMD<sup>8</sup>.

Each of the 188 residues was then assigned to a node in a graph and edges between residues were added where the above analysis indicated that a hydrogen bond or a salt bridge was present or when the two residues were in close proximity to one another. Only one edge between two residues was permitted and hence a salt bridge takes priority over a hydrogen bond which takes priority over an edge indicating proximity. Edges were added between

two proximal residues if difference in ASA is  $> 10 \text{ \AA}^2$ . This ensured that the edges indicating proximity are meaningful and that the resulting packing is likely to stabilise the protein. The clusters (connected subgraphs) of the resulting undirected graph were then identified and, for example, the distribution of cluster sizes and which residues are involved in each cluster were then recorded. This analysis was performed using the NetworkX python module<sup>14</sup>. It is common to measure the change in accessible surface area to water of a chemical moiety as means to estimate for the partitioning free energy<sup>15</sup>. Since the mutated sidechains were typically buried or exposed to lipid whether the channel is open or closed we are not using the accessible surface area in this way. Instead we are assessing how the packing between residues changes as the channel changes conformation and hence are assuming that the more tightly packed the interior of the channel, the lower its free energy. As discussed in the next section, in this context the radius of the probe is a simple way of including some measure of the thermal fluctuation inherent in the protein under the experimental conditions.

#### 1.4 Relating the probe radius to the predicted atomic root mean square fluctuation

The Debye-Waller B-factors ( $B$ ) measured by x-ray crystallography for each atom can be related to the average root mean square fluctuation (RMSF,  $\langle \Delta R^2 \rangle^{1/2}$ ) via<sup>16,17</sup>

$$B = \frac{8\pi^2}{3} \langle \Delta R^2 \rangle.$$

The interpretation is often difficult since the  $B$ -factors also contain a component of the statistical error arising from inferring the position of the atom from the observed electron density. This contribution, however, can be minimised by examining high resolution crystal structures. None of the available structures of inwardly-rectifying potassium channels are of sufficiently high resolution, however, there are several high resolution structures of similar tetrameric cation channels, including KcsA<sup>18</sup> (PDB:1K4C, 2.0  $\text{\AA}$  resolution), NaK<sup>19</sup> (PDB:3OUF, 1.55  $\text{\AA}$  resolution) and MthK<sup>20</sup> (PDB:3LDC, 1.45  $\text{\AA}$  resolution). We calculated the estimated RMSF using the above approach for all the  $C\alpha$  carbons for each of these channels. Averages over the entire pore (80 residues) or just the selectivity filter (7 residues) are plotted in Figure S4. The RMSF is hence estimated to be in the range 0.7-0.8  $\text{\AA}$  in the filter and 0.9-1.0  $\text{\AA}$  for the pore. Using a probe radius in this range in the above proximity analysis is therefore a simple but effective method of modelling the thermal fluctuations in the protein. Indeed when we analysed the connectivity of the graphs in each model of Kir1.1 (Figure S5) we observed a sudden increase in the size of the largest sub-graph when the probe radius was in the range 0.8-1.0  $\text{\AA}$ . We therefore used a probe radius of 1.0  $\text{\AA}$  to interpret the connectivity of the graphs. Noskov et al.<sup>17</sup> also estimate that the RMSF of atoms in the filter of the KcsA channel to be roughly on the order of 1.0  $\text{\AA}$ .



## 2 Supplementary Tables

**Table S1.** (Refers to Figure 1) This is contained within a separate file and lists the mutations analysed and their effect on the measured  $\text{pH}_{0.5}$  and Hill coefficients. If a simple alanine mutation led to a channel with no expression, a more conservative mutation was tried. If this also failed, in some cases a co-expression with wildtype was then attempted. Standard errors were calculated in the usual way and are also included.

**Table S2.** (Refers to Experimental Procedures and Figure 2 and Figure 3). This describes (i) which homologs were used for each model of Kir1.1 and (ii) a series of simple metrics (explained in the text above) which characterise how open the bundle crossing of each model is and how close the CTD is to the TMD.

## 3 Supplementary Movies

**Movie S1.** (Refers to Figure 1) The model of closed Kir1.1 is rotated showing which positions (a) were mutated (grey), (b) where mutation resulted in no functional activity (orange), (c) where mutation changed the  $\text{pH}_{0.5}$  by less than 0.4 pH units (green), (d) where  $\text{pH}_{0.5} < 6.0$  (blue) and (e) where  $\text{pH}_{0.5} > 6.8$  (red, 47 positions).

**Movie S2.** (Refers to Figure 3) Five separate networks identified in the closed state fuse together forming a single network in the pre-open state which persists in the open state. The five largest networks (four identical in the TMD and one connecting all the G-loops in the CTD) in the closed state are shown on the model using space-filling spheres. As an aid to understanding, a morph from the closed to the pre-open state is shown, demonstrating how the conformational changes cause these networks to fuse together forming a single large network. This network remains approximately the same even when the channel undergoes further conformational changes and opens. This is illustrated by a morph from the pre-open to open state (Open-Kir3.2 model).

## 4 Supplementary Figures 1–6

All figures herein are referred to in either the main body of the paper or the **Supplementary Methods** section.

## References

1. Tao, X., Avalos, J. L., Chen, J. & MacKinnon, R. Crystal structure of the eukaryotic strong inward-rectifier  $\text{K}^+$  channel Kir2.2 at 3.1 Angstrom resolution. *Science* **326**, 1668–74 (2009).
2. Hansen, S. B., Tao, X. & MacKinnon, R. Structural basis of PIP2 activation of the classical inward rectifier  $\text{K}^+$  channel Kir2.2. *Nature* **477**, 495–8 (2011).
3. Bavro, V. N., De Zorzi, R., Schmidt, M. R., Muniz, J. a. R. C., Zubcevic, L. *et al.* Structure of a KirBac potassium channel with an open bundle crossing indicates a mechanism of channel gating. *Nat Struct Mol Biol* **19**, 158–63 (2012).

| Model          | N-terminus | Slide & TM1 helices | EC loop                      | P-helix, Filter, TM2 helix & CTD | A180 C $\alpha$ -C $\alpha$ distance (Å) | Pore radius (Å) | CTD (°) | CTD height (Å) |
|----------------|------------|---------------------|------------------------------|----------------------------------|------------------------------------------|-----------------|---------|----------------|
| Closed         |            |                     | Kir2.2                       |                                  | 15.8                                     | 1.5             | -       | -              |
| Pre-open       |            |                     | Kir2.2 with PIP <sub>2</sub> |                                  | 14.8                                     | 2.1             | 2.1     | 5.3            |
| Open-Kir3.2    | Kirchim    | Kir3.2              | Kir2.2                       | Kir3.2                           | 18.5                                     | 3.0             | 10.0    | 6.7            |
| Open-KirBac-EM |            | KirBac1.1EM         | Kir2.2                       | KirBac1.1EM                      | 20.2                                     | 3.8             | 31.3    | 7.2            |

**Table S2** (Refers to Experimental Procedures and Figure 2 and Figure 3) Construction of the Kir1.1 homology models. Also given are the pore radius, measured over a 7 Å window, and the angle and height of the CTD measured relative to the Closed model. The PDB codes for each homolog are given in the **Supplementary Methods** and an alignment can be found in Fig S6.

4. Whorton, M. R. & MacKinnon, R. Crystal Structure of the Mammalian GIRK2 K(+) Channel and Gating Regulation by G Proteins, PIP(2), and Sodium. *Cell* **147**, 199–208 (2011).
5. Domene, C., Doyle, D. A. & Vénien-Bryan, C. Modeling of an ion channel in its open conformation. *Biophys J* **89**, L01–3 (2005).
6. Nishida, M., Cadene, M., Chait, B. T. & MacKinnon, R. Crystal structure of a Kir3.1-prokaryotic Kir channel chimera. *EMBO J* **26**, 4005–15 (2007).
7. Sali, A. & Blundell, T. L. Comparative protein modelling by satisfaction of spatial restraints. *J Mol Biol* **234**, 779–815 (1993).
8. Humphrey, W., Dalke, A. & Schulten, K. VMD: visual molecular dynamics. *J Mol Graph* **14**, 33–8 (1996).
9. Lovell, S. C., Davis, I. W., Arendall, W. B., de Bakker, P. I. W., Word, J. M. *et al.* Structure validation by Alpha geometry: phi,psi and Cbeta deviation. *Proteins* **50**, 437–50 (2003).
10. Hess, B., Kutzner, C., van der Spoel, D. & Lindahl, E. GROMACS 4: Algorithms for Highly Efficient, Load-Balanced, and Scalable Molecular Simulation. *J Chem Theo Comp* **4**, 435–447 (2008).
11. Cuello, L. G., Jogini, V., Cortes, D. M., Pan, A. C., Gagnon, D. G. *et al.* Structural basis for the coupling between activation and inactivation gates in K<sup>+</sup> channels. *Nature* **466**, 272–275 (2010).
12. Smart, O. S., Neduvélil, J. G., Wang, X., Wallace, B. A. & Sansom, M. S. P. HOLE: a program for the analysis of the pore dimensions of ion channel structural models. *J Mol Graph* **14**, 354–60 (1996).
13. Beckstein, O., Tai, K. & Sansom, M. S. P. Not ions alone: barriers to ion permeation in nanopores and channels. *J Am Chem Soc* **126**, 14694–5 (2004).
14. Hagberg, A. A., Schult, D. A. & Swart, P. J. Exploring Network Structure, Dynamics, and Function using NetworkX. In G. Varoquaux, T. Vaught & J. Millman, eds., *Proceedings of the 7th Python in Science Conference (SciPy2008)*, SciPy, pp. 11–15. Pasadena, CA USA (2008).
15. Richards, F. M. Areas, volumes, packing and protein structure. *Ann Rev Biophys* **6**, 151–76 (1977).
16. Halle, B. Flexibility and packing in proteins. *Proc Natl Acad Sci U S A* **99**, 1274–9 (2002).
17. Noskov, S. Y., Bernèche, S. & Roux, B. Control of ion selectivity in potassium channels by electrostatic and dynamic properties of carbonyl ligands. *Nature* **431**, 830–4 (2004).
18. Zhou, Y., Morais-Cabral, J. H., Kaufman, A. & MacKinnon, R. Chemistry of ion coordination and hydration revealed by a K<sup>+</sup> channel-Fab complex at 2.0 Å resolution. *Nature* **414**, 43–8 (2001).
19. Derebe, M. G., Zeng, W., Li, Y., Alam, A. & Jiang, Y. Structural studies of ion permeation and Ca<sup>2+</sup> blockage of a bacterial channel mimicking the cyclic nucleotide-gated channel pore. *Proc Natl Acad Sci U S A* **108**, 592–597 (2011).

20. Ye, S., Li, Y. & Jiang, Y. Novel insights into K(+) selectivity from high-resolution structures of an open K(+) channel pore. *Nat Struct Mol Biol* **17**, 1019–23 (2010).

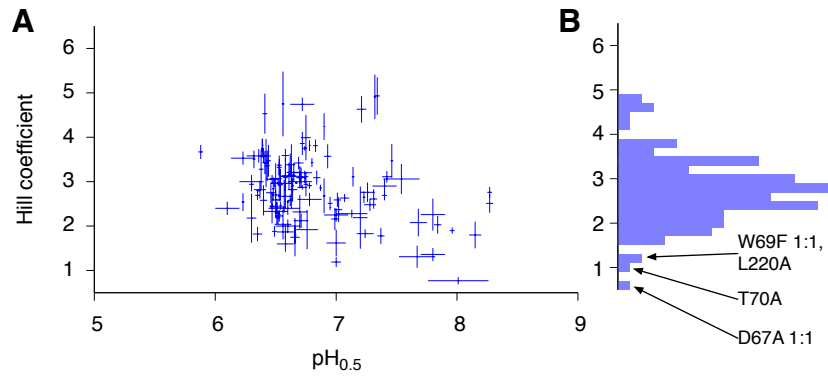

**Figure S1** (Refers to Figure 1 and Figure 5) **(A)** Lack of correlation between the  $pH_{0.5}$  and the Hill coefficients estimated from the electrophysiological data. Experimental estimates of the error in both quantities are plotted. **(B)** Unlike the  $pH_{0.5}$  values, the estimated Hill coefficients form an approximately symmetric distribution with the wildtype ( $2.5 \pm 0.2$ ) being close to the center.

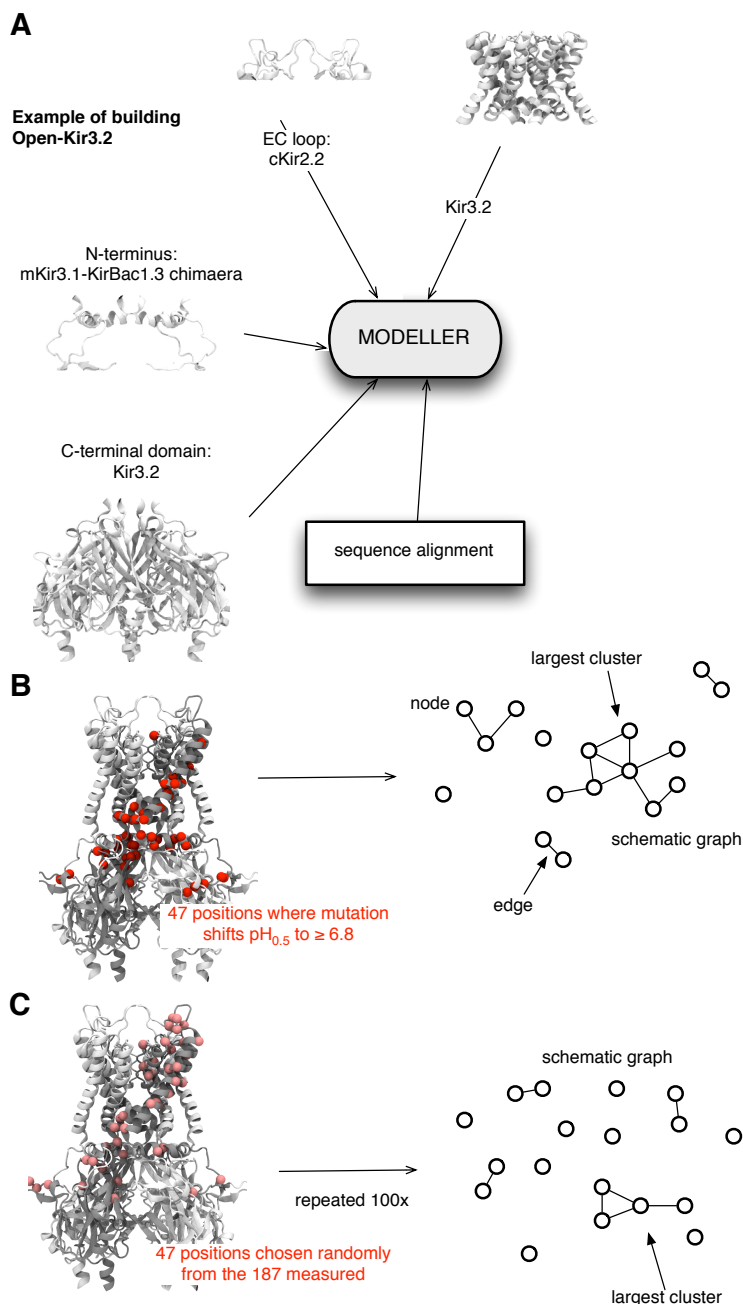

**Figure S2** (Refers to Experimental Procedures and Figure 2) Schematic illustrating how homology models were built and analysed. **(A)** Although mainly built using one of the monomers from the R201A Kir3.2 PIP<sub>2</sub> bound structure<sup>4</sup>, the Open-Kir3.2 model of Kir1.1 required several templates (see **Supplementary Table S2**) as shown. **(B)** The 47 positions which shift the  $pH_{0.5}$  by more than 0.4 units are mapped onto each model. These define the nodes of a graph. Edges were added where residues either pack close to one another, are hydrogen bonded or form a salt bridge, as described in the **Supplementary Methods**. The connectivity of the resulting graph is then analysed, in particular the distribution of cluster sizes. **(C)** To check that these clusters did not arise by chance or simply because the open models are more compact, 47 positions were also selected at random from the 187 positions tested and the resulting graphs analysed. This was repeated 100 times for each model and the results compared to the set of experimentally identified residues (Figure S5).

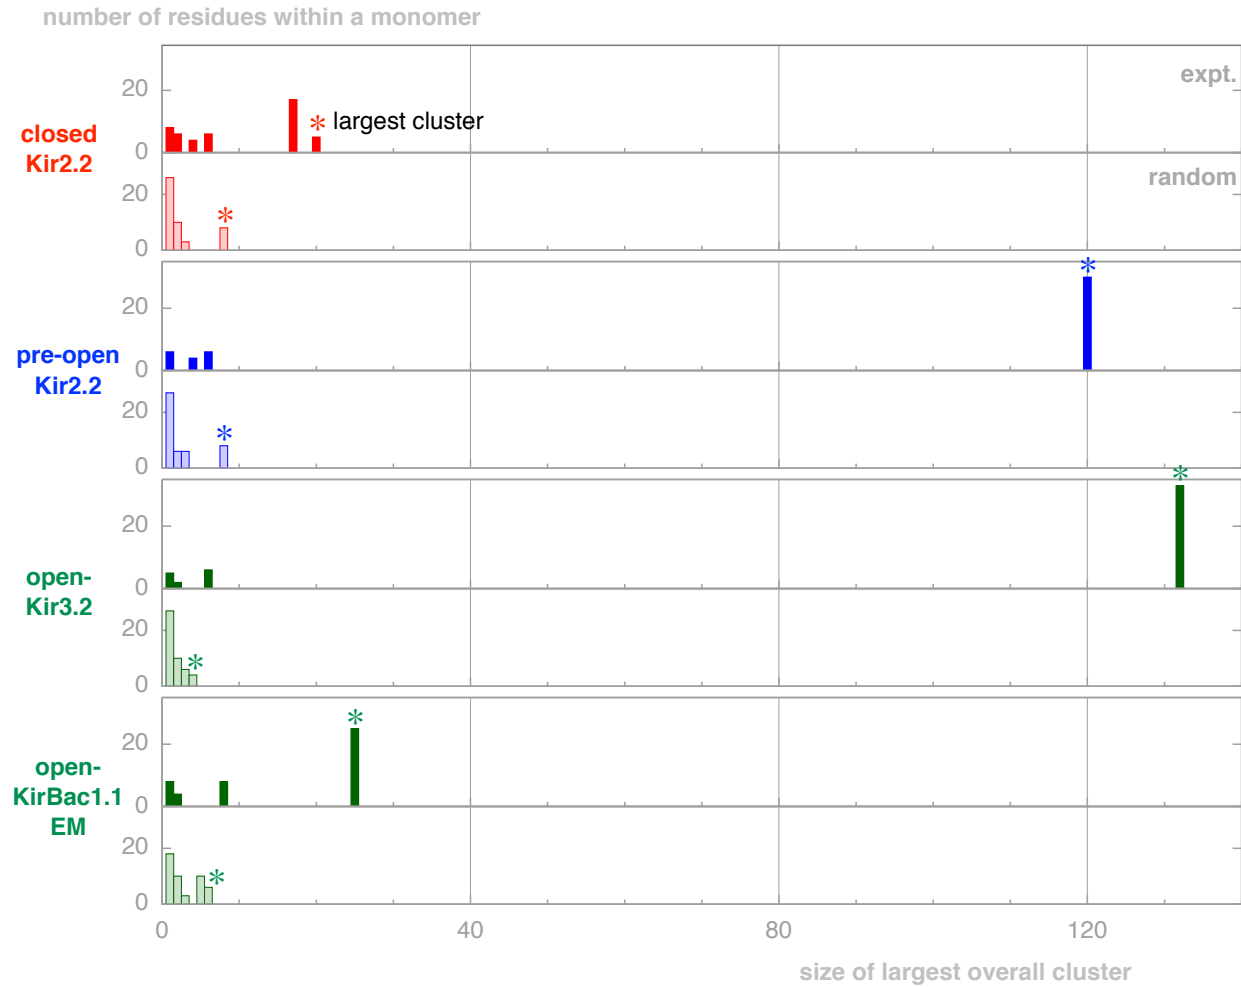

**Figure S3** (Refers to Figure 2B) Large clusters form in the Pre-open and Open-Kir3.2 models but not in the Closed and control Open-KirBac-EM models. To test if these networks are significant the bottom panel for each model shows one example where 47 residues are chosen randomly and the resulting network analysed. This is repeated 100 times and the average and ranges are shown in Figure S5. The single largest cluster in each case is indicated by an arrow.

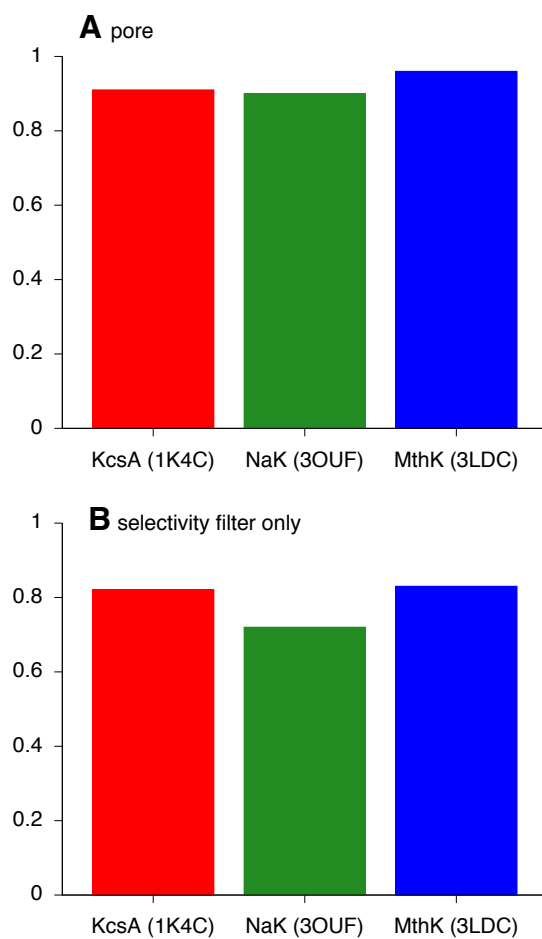

**Figure S4** (Refers to Experimental Procedures and Figure 2B) The average RMSFs predicted from the Debye-Waller crystallographic  $B$ -factors for three high resolution ion channel structures are in the range **(A)** 0.9-1.0 Å for  $C\alpha$  in the pore and **(B)** 0.7-0.8 Å for  $C\alpha$  atoms in the selectivity filter. The structures are KcsA (PDB:1K4C, 2.0 Å resolution)<sup>18</sup>, NaK (PDB:3OUF, 1.55 Å resolution)<sup>19</sup> and MthK (PDB:3LDC, 1.45 Å resolution)<sup>20</sup>.



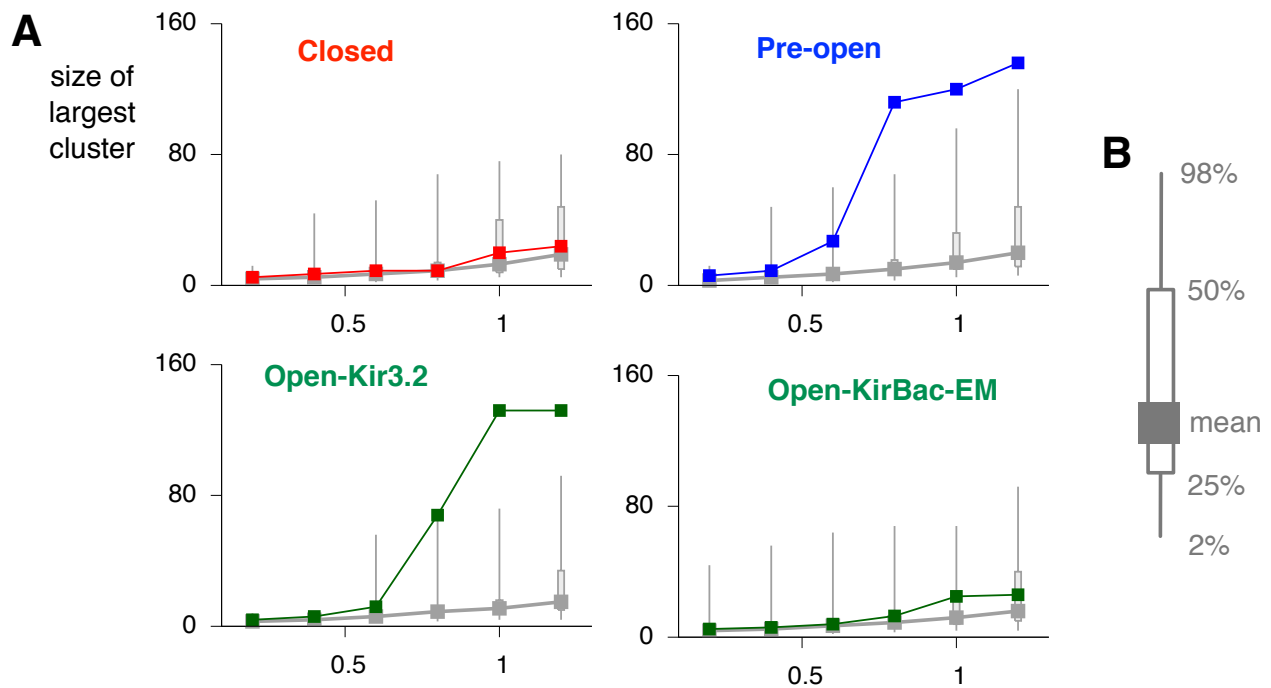

**Figure S5** (Refers to Experimental Procedures and Figures 2C-F) The clustering observed when the experimentally identified 47 positions are mapped onto the pre-open and open state models of Kir1.1 is much greater than when graphs formed using sets of 47 randomly chosen positions are analysed. **(A)** How the size of the largest cluster varies with the probe radius. To test if the large clusters that form in the Pre-open and Open-Kir3.2 models are significant when the probe radius is  $> 0.6 \text{ \AA}$  we repeated the graph-based analysis for 100 models where 47 positions were randomly chosen from the 187 positions tested. This is repeated for all three models and the control Open-KirBac-EM model and yields a distribution of sizes for the largest cluster at each probe radius. This is drawn as a box-whiskers plot as defined in **(B)**. At a probe radius of  $1.0 \text{ \AA}$  the size of the largest experimental cluster is larger than any of the 100 randomly assigned cluster for the Pre-open and Open-Kir3.2 models but not for the closed or low-resolution Open-KirBac-EM models.

```

50      60      70      80      90      100     110
Kir1.1  CNIEFGNVEAQSRRFIFV D I W T T V L D L K W R Y K M T F I T A F L G S W F F F G L L W Y A V A Y I H K D L P E F H P S A N H
Kir2.2  CNVEFTNMDDKPD . R Y I A D M F T T C V D I R W R Y M L L L F S L A F L V S W L L F G L I F W L I A L I H G D L E N P G G D D T F
Kir3.2  CNVHHGNVR . E T . Y R Y L T D I F T T L V D L K W R F N L L I F V M V Y T V T W L F F G M I W W L I A Y I I R G D M D H I E D P S . W
Kirchim  CNVQHGNLGSSETS . R Y L S D L F T T L V D L K W R W F F V S L A V L F L L L N T A F A T L Y M L G A L I H G D L E N P G G D D T F
KirBac1.1  . . . R E V I A Y G M P A S V W R . D L Y W A L K V S W P V F F A S L A A L F V V N N T L F A L L Y Q L I A L I H G D L E N P G G D D T F
KirBac3.1  . . . N I T R L . . . . . W L D . D H Y H D L L T V S W P V F I T L I T G L Y L V T N A L F A L A Y L A C H G D L E N P G G D D T F K P C

120     130     140     150     160     170     180
Kir1.1  T P C V E N I N G L T S A F L F S L E T Q V T I G Y G F R C V T E Q C A T A I F L L I F Q S I L G V I I N S F M C G A I L A K I S R P K K R
Kir2.2  K P C V L Q V N G F V A A F L F S I E T Q T T I G Y G F R C V T E E C P L A V F M V V V Q S I V G C I I D S F M I G A I M A K M A R P K K R
Kir3.2  T P C V T N L N G F V S A F L F S I E T E T T I G Y G Y R V I T D K C P E G I I L L L I Q S V L G S I V N A F M V G C M F V K I S O P K K A
Kirchim  K P C V L Q V N G F G G A F F S V E T L A T V G Y G D M H . . P Q T V Y A H W I A T L E I F V G M S S I A L A T G C A F I K M S O P K K R
KirBac1.1  K P C V L Q V P G F V G A F F S V E T L A T V G Y G D M H . . P Q T V Y A H A I A T L E I F V G M S G I A L S T G L V F A R F A R P . . R
KirBac3.1  V L Q V N G F G S F T D A F F S V Q T M A T I G Y G K L I . . P I G P L A N T L V T L E A L C G M L G L A V A A S L I Y A R F T R P . . T

190     200     210     220     230     240     250
Kir1.1  A K T I T F S K N A V I S K R G G K L C L L I R V A N L R K S L L I G S H I Y G K L L K T T V T P E G E T I I L D Q I N I N F V V D A G N E
Kir2.2  A Q T L L F S H N A V V A M R D G K L C L M W R V G N L R K S H I V E A H V R A Q L I K P R I T E E G E Y I P L D Q I D I D V G F D K G L D
Kir3.2  A E T L V F S T H A V I S M R D G K L C L M F R V G D L R N S H I V E A S I R A K L I K S K Q T S E G E F I P L N Q T D I N V G Y T G D D
Kirchim  A E T L M F S E H A V I S M R D G K L T L M F R V G N L R N S H M V S A Q I R C K L L K S R Q T P E G E F L P L D Q L E L D V G F S T G A D
KirBac1.1  A K . I M F A A H A T V R P P F N G A M T L M V R A A N A R Q N V I A E A R A K M R L A . . . . . A M K I H . . . D L K L V A N E H
KirBac3.1  A G . V L F S S R M V I S D F E G K P T L M M R L A N L R I E Q I I E A D V H L V L V R S E I S Q E G M V F R R F H . . . D L T L T R S R S

260     270     280     290     300     310     320
Kir1.1  N L F F I S P L T I Y H V T D H N S F F F H M A . A E T L L Q Q D F E L V V F L D G T V E S T S A T C Q V R T S Y V P E E V L W G Y R F A P
Kir2.2  R I F L V S P I T I L H E I N E D S P L F G I S . R Q D L E T D D F E I V V I L E G M V E A T A M T T Q A R S S Y L A S E I L W G H R F E P
Kir3.2  R L F L V S P L I I S H E I N Q Q S F F W E I S . K A Q L P K E E L E I V V I L E G M V E A T G M T C Q A R S S Y I T S E I L W G Y R F T P
Kirchim  Q L F L V S P L T I C H V I D A K S F F Y D L S . Q R S M Q T E Q F E V V V I L E G I V E T T G M T C Q A R T S Y T E D E V L W G H R F F P
KirBac1.1  P I F L L G . W N M M H V I D A S S P L F G E T P A S L A E . G R A M L L V M I E G S D E T T A Q V M Q A R H A W E H D D I R W H H R Y V D
KirBac3.1  P I F S L S . W T V M H P T D H H S P I Y G E T . D E T L R N . S H S E F L V L F T G H H E A F A Q N V H A R H A Y S C D E I I W G G H F V

330     340     350
Kir1.1  I V S K T K E G K Y R V D F H N F S K T V E V
Kir2.2  V L F E E K . N Q Y K V D Y S H F H K T Y E V
Kir3.2  V L T L . E D G F Y E V D Y N S F H E T Y E T
Kirchim  V I S L E . E G F F K V D Y S Q F H A T F E V
KirBac1.1  L M A . . . . . A I D Y T R F N D T E P V
KirBac3.1  D V F T T . . . . . R A L D L G K F H E I A Q

```

**Figure S6** (Refers to Figure 3) There is a high degree of similarity between Kir1.1 and the homologs used to build the models of Kir1.1. The whole of Kir3.2 is not resolved in the crystal structure<sup>4</sup>, in particular the N-terminus and the large extracellular loop. The former was modeled using the Kirchim structure and the latter Kir2.2. For more details about how the models were constructed see **Supplementary Table S2**
